# Supplementary material for: Indoleamine 2,3‐Dioxygenase‐Dependent Neurotoxic Kynurenine Metabolism Contributes to Poststroke Depression Induced in Mice by Ischemic Stroke along with Spatial Restraint Stress
Source: Hindawi journal article supplement (doi:10.1155/2018/2413841), 2018-01-01

**Supplementary Figure S1. Effect of aripiprazole on the BDNF expression in the brain of PSD mice.** (A) Representative photomicrographs of immunofluorescent staining of BDNF in the nucleus accumbens (NAc) of control (Con), sham (PSD), and aripiprazole-treated mice (PSD+APZ). BDNF was labeled with green fluorescence and nuclear DNA was labeled with blue fluorescence by DAPI. Scale bar = 100  $\mu$ m. (B) Quantification graphs of BDNF fluorescence intensity. Data are expressed as the mean  $\pm$  SEM (N=4). \* P < 0.05 vs. control; # P < 0.05 vs. PSD.

# Supplementary Figure S1

## A BDNF at NAc

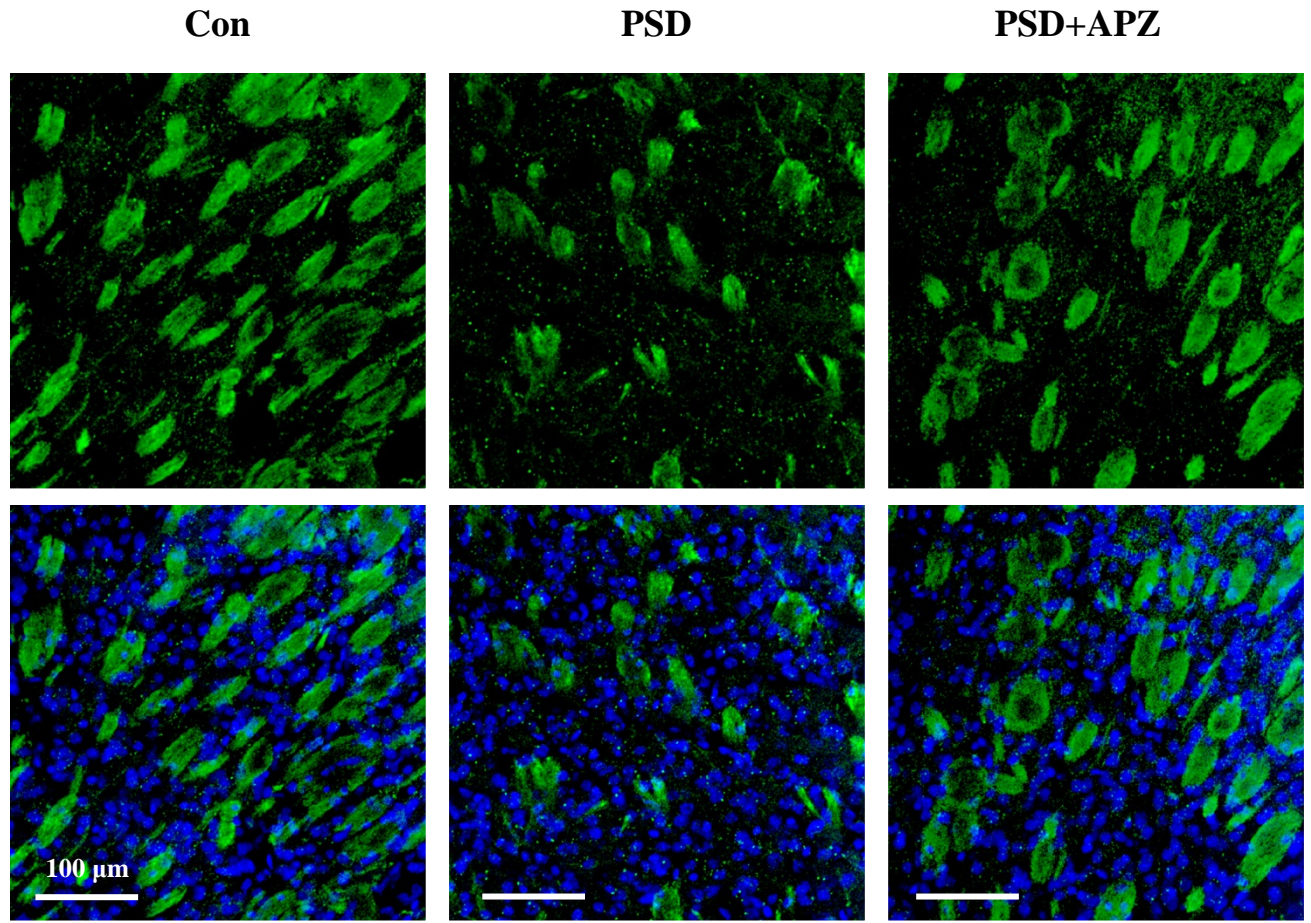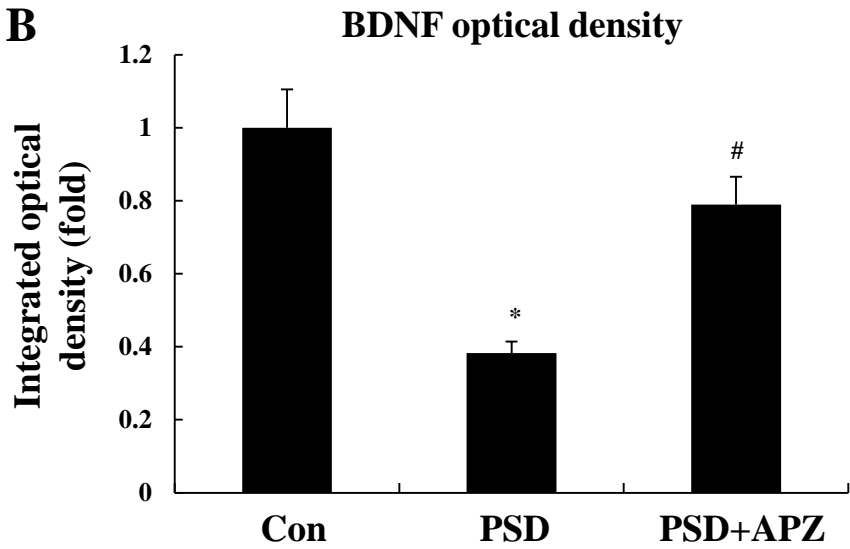

Supplement: f1 [file 2413841.f1.pdf]
